# Supplementary material for: Activation Mechanism of RhoA Caused by Constitutively Activating Mutations G14V and Q63L
Source: MDPI journal article supplement (doi:10.3390/ijms232415458), 2022-12-07
Supplement: s1 [file s1]

# **SUPPLEMENTARY MATERIAL**

## **Activation Mechanism of RhoA Caused by Constitutively Activating Mutations G14V and Q63L**

**Shiyao Chen <sup>†</sup>, Zirui Zhang <sup>†</sup>, Yijing Zhang, Taeyoung Choi and Yaxue Zhao <sup>\*</sup>**

School of Pharmacy, Shanghai Jiao Tong University, 800 Dongchuan Road, Shanghai 200240, China

<sup>\*</sup> Correspondence: yaxuezhao@sjtu.edu.cn

<sup>†</sup> These authors contributed equally to this work.

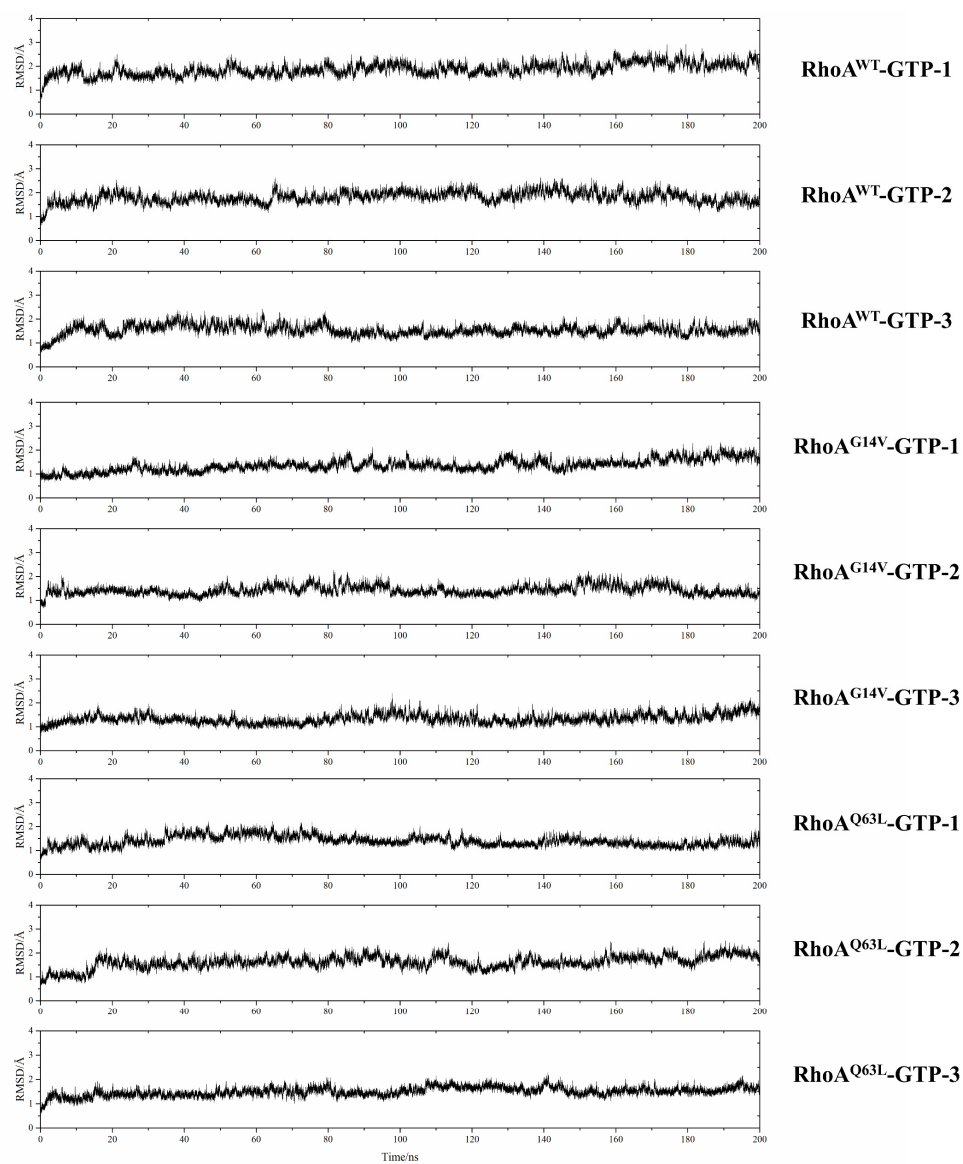

**Figure S1.** Time series of RMSD values of complexes RhoA<sup>WT</sup>-GTP, RhoA<sup>G14V</sup>-GTP, and RhoA<sup>Q63L</sup>-GTP during the triple 200 ns MD simulations.

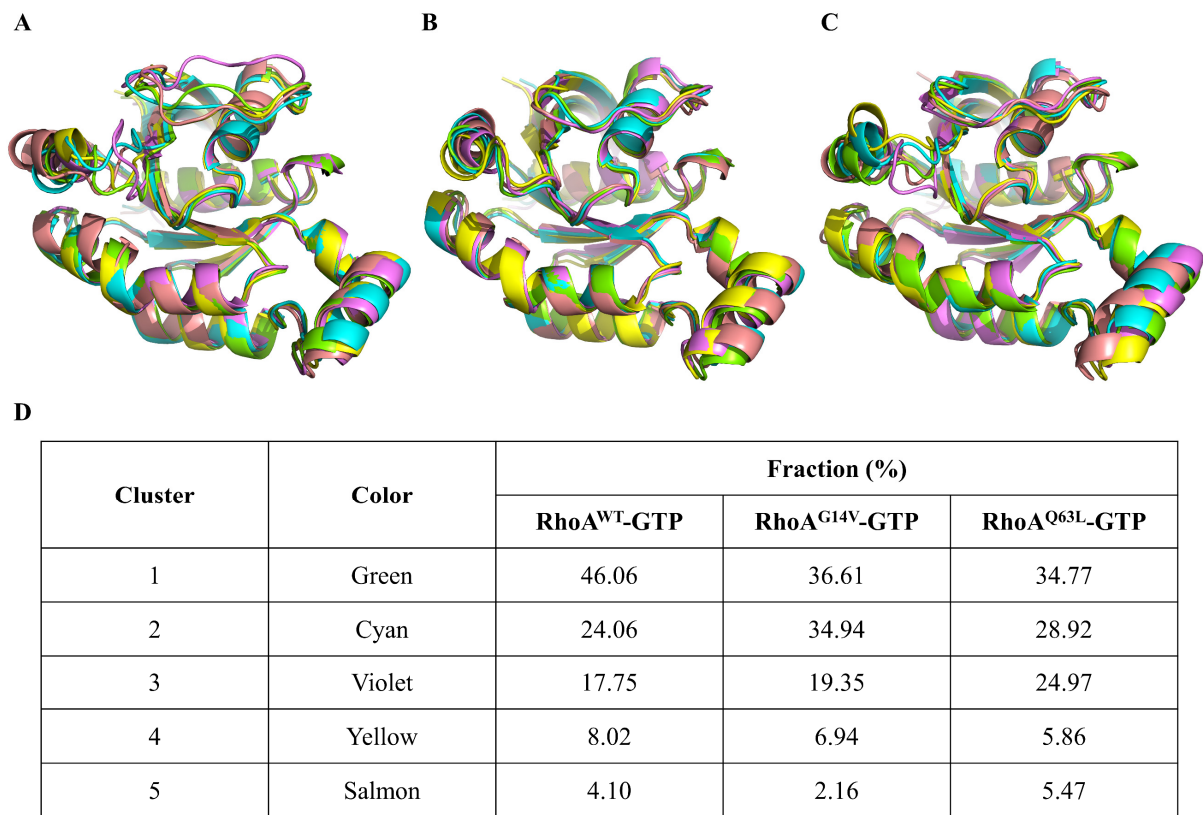

**Figure S2.** Representative structures of the five clusters of RhoA in systems RhoA<sup>WT</sup>-GTP (A), RhoA<sup>G14V</sup>-GTP (B), and RhoA<sup>Q63L</sup>-GTP (C) obtained from clustering. The colors and fractions of each cluster are listed in (D).

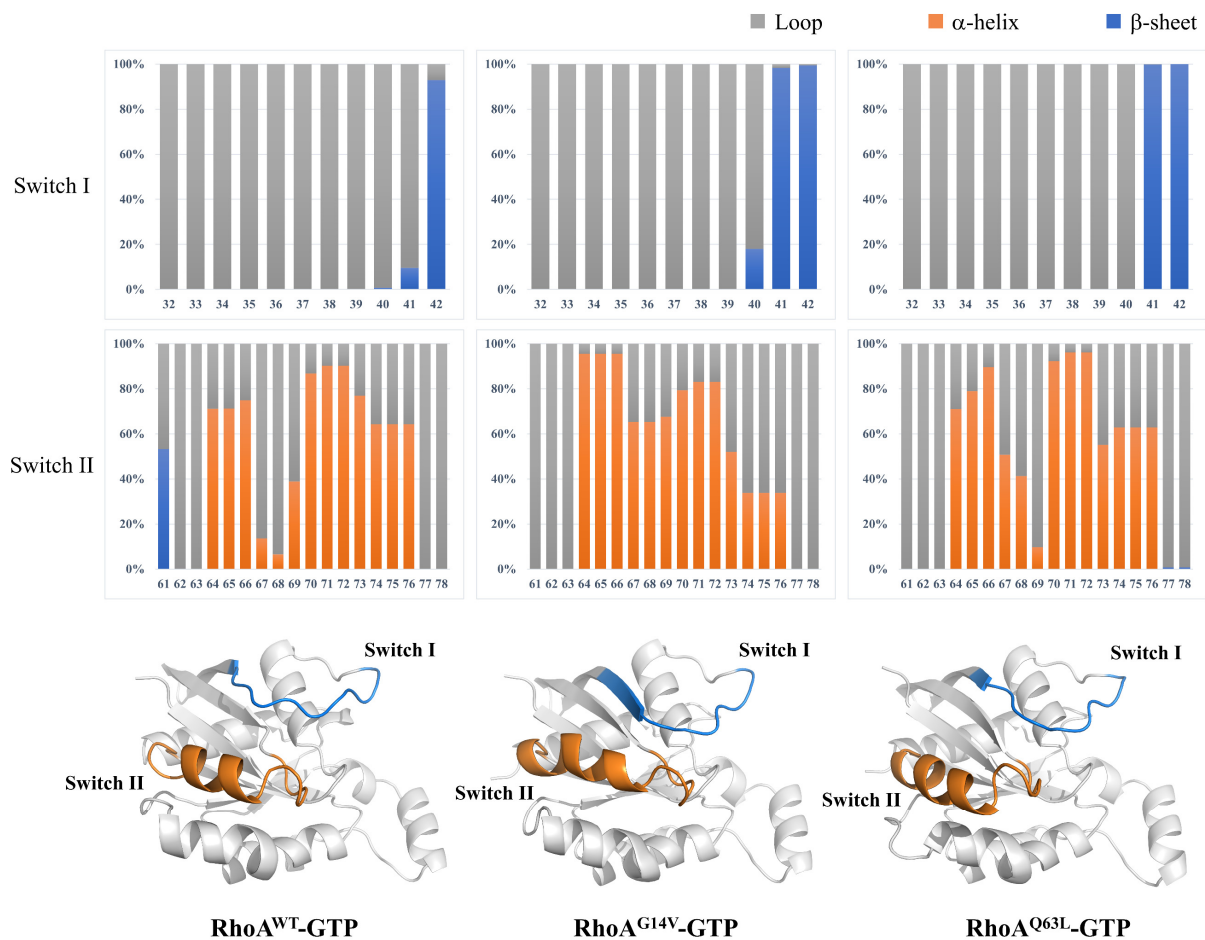

**Figure S3.** The overall secondary structure assignment for residues located on switch I and II regions in GTP-bound RhoA<sup>WT</sup>, RhoA<sup>G14V</sup>, and RhoA<sup>Q63L</sup> throughout the MD simulations. The representative structure for each protein was shown as cartoon, with the two switch regions highlighted and labeled.

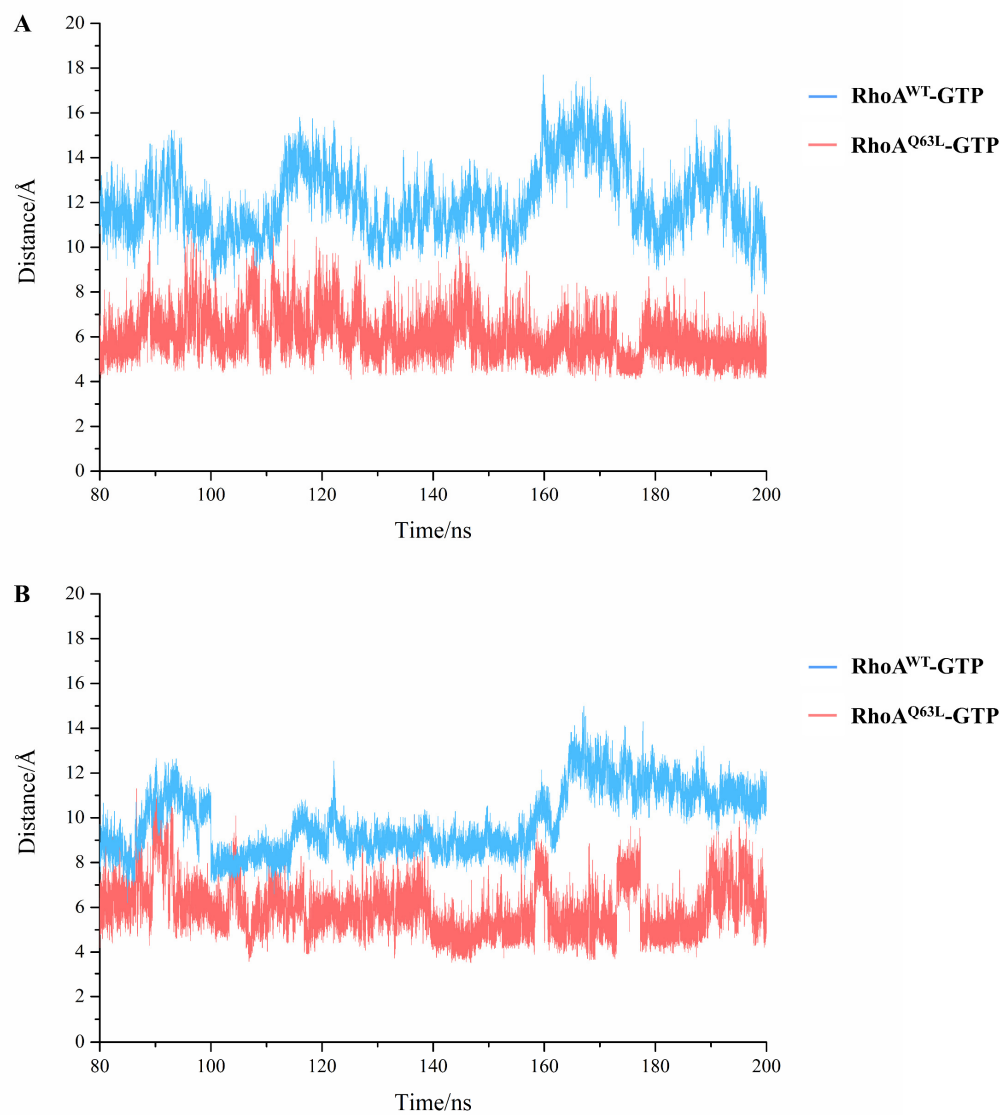

**Figure S4.** Time series of the distances from the centroid of the side-chain heavy atoms of V38 to the centroid of the side-chain heavy atoms of L63 (or Q63 in the wild type) (A) and to the centroid of the side-chain heavy atoms of Y66 (B) in RhoA<sup>WT</sup>-GTP and RhoA<sup>Q63L</sup>-GTP.

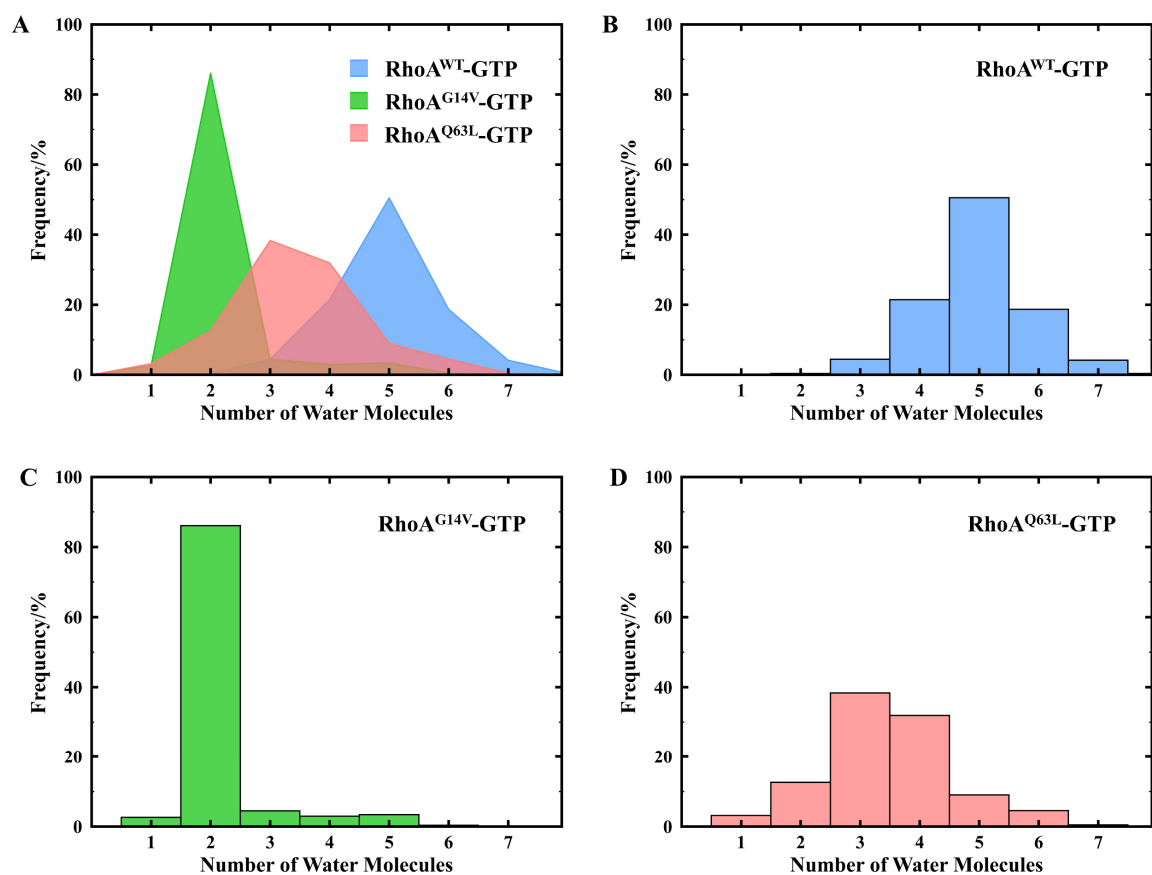

**Figure S5.** The probability distributions of the average numbers of water molecules within 3.0 Å around the GTP's  $\gamma$ -phosphate in RhoA<sup>WT</sup>-GTP, RhoA<sup>G14V</sup>-GTP, and RhoA<sup>Q63L</sup>-GTP during the simulation time (A) and the individual frequency histograms for each system (B-D).

**A**

|                   | 12       | 19 | 32          | 42 | 61               | 78 |
|-------------------|----------|----|-------------|----|------------------|----|
| Human_RhoA        | GDGACGKT |    | EVYVPTVFENY |    | AGQEDYDRLRPLSYPD | TD |
| Chimpanzee_RhoA   | GDGACGKT |    | EVYVPTVFENY |    | AGQEDYDRLRPLSYPD | TD |
| Mouse_RhoA        | GDGACGKT |    | EVYVPTVFENY |    | AGQEDYDRLRPLSYPD | TD |
| Rat_RhoA          | GDGACGKT |    | EVYVPTVFENY |    | AGQEDYDRLRPLSYPD | TD |
| Zebrafish_RhoA -A | GDGACGKT |    | EVYVPTVFENY |    | AGQEDYDRLRPLSYPD | TD |
| Zebrafish_RhoA -B | GDGACGKT |    | EVYVPTVFENY |    | AGQEDYDRLRPLSYPD | TD |
| Zebrafish_RhoA -C | GDGACGKT |    | EVYVPTVFENY |    | AGQEDYDRLRPLSYPD | TD |
| Zebrafish_RhoA -D | GDGACGKT |    | EVYVPTVFENY |    | AGQEDYDRLRPLSYPD | TD |

**B**

| Species          | Length | Identity | Similarity |
|------------------|--------|----------|------------|
| Human_RhoA       | 193    | /        | /          |
| Chimpanzee_RhoA  | 193    | 100.0%   | 100.0%     |
| Mouse_RhoA       | 193    | 99.5%    | 100.0%     |
| Rat_RhoA         | 193    | 99.5%    | 100.0%     |
| Zebrafish_RhoA-A | 193    | 93.3%    | 96.4%      |
| Zebrafish_RhoA-B | 193    | 95.9%    | 96.9%      |
| Zebrafish_RhoA-C | 193    | 96.4%    | 97.9%      |
| Zebrafish_RhoA-D | 193    | 94.3%    | 97.4%      |

**Figure S6.** Comparisons between RhoA encoded in human and other species. (A) Sequence alignment of the P-loop (residues 12-19), switch I (residues 32-42), and switch II (residues 61-78) regions for different RhoA proteins. The two mutation sites G14 and Q63 are colored green and pink, respectively. (B) Sequence similarities between RhoA encoded in human and other species.

**Table S1.** Hydrogen bonds between GTP and RhoA with an average fraction of more than 75% in any of the three systems over the last 120 ns of the simulations.

| Molecule (Group) |                  | System (Fraction%)      |                           |                           |
|------------------|------------------|-------------------------|---------------------------|---------------------------|
| GTP              | RhoA             | RhoA <sup>WT</sup> -GTP | RhoA <sup>G14V</sup> -GTP | RhoA <sup>Q63L</sup> -GTP |
| GTP@O3G          | LYS_18@NZ-HZ     | 97.23 <sup>†</sup>      | 99.99 <sup>†</sup>        | 97.16 <sup>†</sup>        |
| GTP@O2G          | PRO_36@CA-HA     | 9.99                    | 89.02                     | 42.79                     |
| GTP@O2G          | THR_37@N-H       | 0.01                    | 98.90                     | 77.77                     |
| GTP@O1G          | ALA_15@N-H       | 97.72                   | 99.79                     | 99.05                     |
| GTP@O1G          | TYR_34@OH-HH     | 90.47                   | 100.00                    | 99.93                     |
| GTP@PB           | LYS_18@NZ-HZ     | 64.52 <sup>†</sup>      | 81.13 <sup>†</sup>        | 73.30 <sup>†</sup>        |
| GTP@O2B          | THR_19@N-H       | 95.73                   | 98.73                     | 94.96                     |
| GTP@O1B          | GLY_17@N-H       | 97.37                   | 99.39                     | 98.99                     |
| GTP@O1B          | LYS_18@NZ-HZ     | 99.98 <sup>†</sup>      | 99.98 <sup>†</sup>        | 99.88 <sup>†</sup>        |
| GTP@O1B          | LYS_18@CG-HG3    | 71.09                   | 82.84                     | 77.79                     |
| GTP@O1B          | LYS_18@N-H       | 99.98                   | 99.99                     | 99.98                     |
| GTP@O3A          | GLY_17@N-H       | 73.81                   | 73.99                     | 75.45                     |
| GTP@O1A          | CYS_20@N-H       | 99.92                   | 99.98                     | 99.98                     |
| GTP@O1A          | CYS_20@SG-HG     | 98.12                   | 98.43                     | 97.92                     |
| GTP@N7           | ASN_117@ND2-HD21 | 95.76                   | 96.88                     | 97.17                     |
| GTP@O6           | LYS_162@N-H      | 95.57                   | 96.34                     | 95.06                     |
| GTP@O5'          | TYR_34@CD1-HD1   | 40.38                   | 81.99                     | 72.64                     |
| GTP@N1-H1        | ASP_120@OD1      | 99.95                   | 97.26                     | 96.40                     |
| GTP@N1-H1        | ASP_120@OD2      | 82.34                   | 91.12                     | 89.28                     |
| GTP@N2-H21       | ASP_120@OD2      | 99.94                   | 99.88                     | 93.53                     |
| Total Fraction   |                  | 1609.88                 | 1885.63                   | 1779.02                   |

<sup>†</sup>, total fraction of the hydrogen bonds between NZ-HZ1, NZ-HZ2, NZ-HZ3 of Lys18 and O3G, PB, O1B of GTP.
